# Supplementary material
Source: PubMed Central journal article supplement (PMC8133769)
Supplement: mmc1.pdf [file mmc1.pdf]

# THE LANCET

## Global Health

### Supplementary appendix 1

This translation in Spanish was submitted by the authors and we reproduce it as supplied. It has not been peer reviewed. *The Lancet's* editorial processes have only been applied to the original in English, which should serve as reference for this manuscript.

Los autores nos proporcionaron esta traducción al español y la reproducimos tal como nos fue entregada. No la hemos revisado. Los procesos editoriales de *The Lancet* se han aplicado únicamente al original en inglés, que debe servir de referencia para este manuscrito.

Supplement to: Álvarez-Antonio C, Meza-Sánchez G, Calampa C, et al. Seroprevalence of anti-SARS-CoV-2 antibodies in Iquitos, Peru in July and August, 2020: a population-based study. *Lancet Glob Health* 2021; published online May 19. [http://dx.doi.org/10.1016/S2214-109X\(21\)00173-X](http://dx.doi.org/10.1016/S2214-109X(21)00173-X).

**English Title:** Seroprevalence of anti-SARS-CoV-2 antibodies in Iquitos, Peru in July and August, 2020: a population-based study

**Título en Español:** Seroprevalencia de anticuerpos anti-SARS-CoV-2 en Iquitos, Loreto, Perú en Julio y Agosto, 2020

Antecedentes: La detección de anticuerpos del SARS-CoV-2 en personas en riesgo es fundamental para comprender tanto la transmisión previa de COVID-19 como la vulnerabilidad de la población a continuar la transmisión y, cuando se realiza en serie, evaluar también la intensidad de transmisión en la comunidad en un intervalo de tiempo determinado. En este estudio, estimamos la seroprevalencia de COVID-19 en una cohorte poblacional representativa de la ciudad de Iquitos, una de las ciudades con las tasas de mortalidad más altas por COVID-19 en el Perú, donde se registró una cantidad devastadora de casos en marzo del 2020. Métodos: Realizamos un estudio poblacional de la transmisión del SARS-CoV-2 en Iquitos, Perú, en dos momentos: del 13 al 18 de julio de 2020 (referencia) y del 13 al 18 de agosto de 2020 (seguimiento de 1 mes). . Obtuvimos una muestra representativa estratificada geográficamente de la población de la ciudad utilizando los datos del censo de 2017, que se actualizaron el 20 de enero de 2020. Se excluyeron las personas que estaban institucionalizadas, las personas que recibían algún tratamiento farmacológico para el COVID-19, las personas con alguna contraindicación para la flebotomía y los trabajadores de la salud o las personas que vivían con un trabajador de salud activo. Se tamizó a cada participante para detectar anticuerpos IgG e IgM anti-SARS-CoV-2 utilizando la prueba rápida COVID-19 IgG/IgM (Zhejiang Orient Gene Biotech, China). Se usó métodos de análisis de tipo encuestas para estimar la seroprevalencia, teniendo en cuenta el efecto del diseño de muestreo y las características de desempeño de la prueba.

Hallazgos: Identificamos 726 individuos elegibles y enrolamos a un total de 716 participantes (99%), distribuidos en 40 estratos (cuatro distritos, dos sexos y cinco grupos de edad). Se excluyeron diez personas, incluyendo: algunos que no tenían el consentimiento de un padre o representante legal (n = 3), otros que se habían mudado a Iquitos después del 6 de marzo de 2020 (n = 3), y otros que estaban en tránsito (n = 2) o tenían síntomas respiratorios (n = 1). Después de ajustar los efectos del muestreo del estudio y la sensibilidad y especificidad de la prueba, estimamos una seroprevalencia del 70% (IC del 95%: 67%-73%) al inicio del estudio y del 66% (IC del 95%: 62%-70%) al mes de seguimiento, con una positividad prueba-reprueba del 65% (IC del 95%: 61%–68%) y una incidencia de nuevas exposiciones del 2% (IC del 95%: 1%–

3%). Observamos diferencias significativas en la seroprevalencia entre los grupos de edad, y los participantes de 18 a 29 años tenían una menor seroprevalencia que los menores de 12 años (razón de prevalencia 0,85 [IC del 95%: 0,73 a 0,98];  $p = 0,029$ ).

Interpretación: Después del primer pico epidémico, Iquitos tuvo una de las tasas más altas de seroprevalencia de anticuerpos anti-SARS-CoV-2 en todo el mundo. Sin embargo, la ciudad experimentó una segunda ola a partir de enero de 2021, probablemente debido a la aparición de la variante SARS-CoV-2 P1, que ha mostrado mayores tasas de transmisibilidad y reinfección.

Financiamiento: Dirección Regional de Salud de Loreto, DIRESA, Loreto, Perú

Palabras clave: Síndrome respiratorio agudo severo Coronavirus 2, COVID-19, Estudios seroepidemiológicos, Perú.
