# Supplementary material
Source: PubMed Central journal article supplement (PMC8133769)

# THE LANCET

## Global Health

### Supplementary appendix 2

This appendix formed part of the original submission and has been peer reviewed. We post it as supplied by the authors.

Supplement to: Álvarez-Antonio C, Meza-Sánchez G, Calampa C, et al. Seroprevalence of anti-SARS-CoV-2 antibodies in Iquitos, Peru in July and August, 2020: a population-based study. *Lancet Glob Health* 2021; published online May 19. [http://dx.doi.org/10.1016/S2214-109X\(21\)00173-X](http://dx.doi.org/10.1016/S2214-109X(21)00173-X).

# Map of the City of Iquitos by Sectors

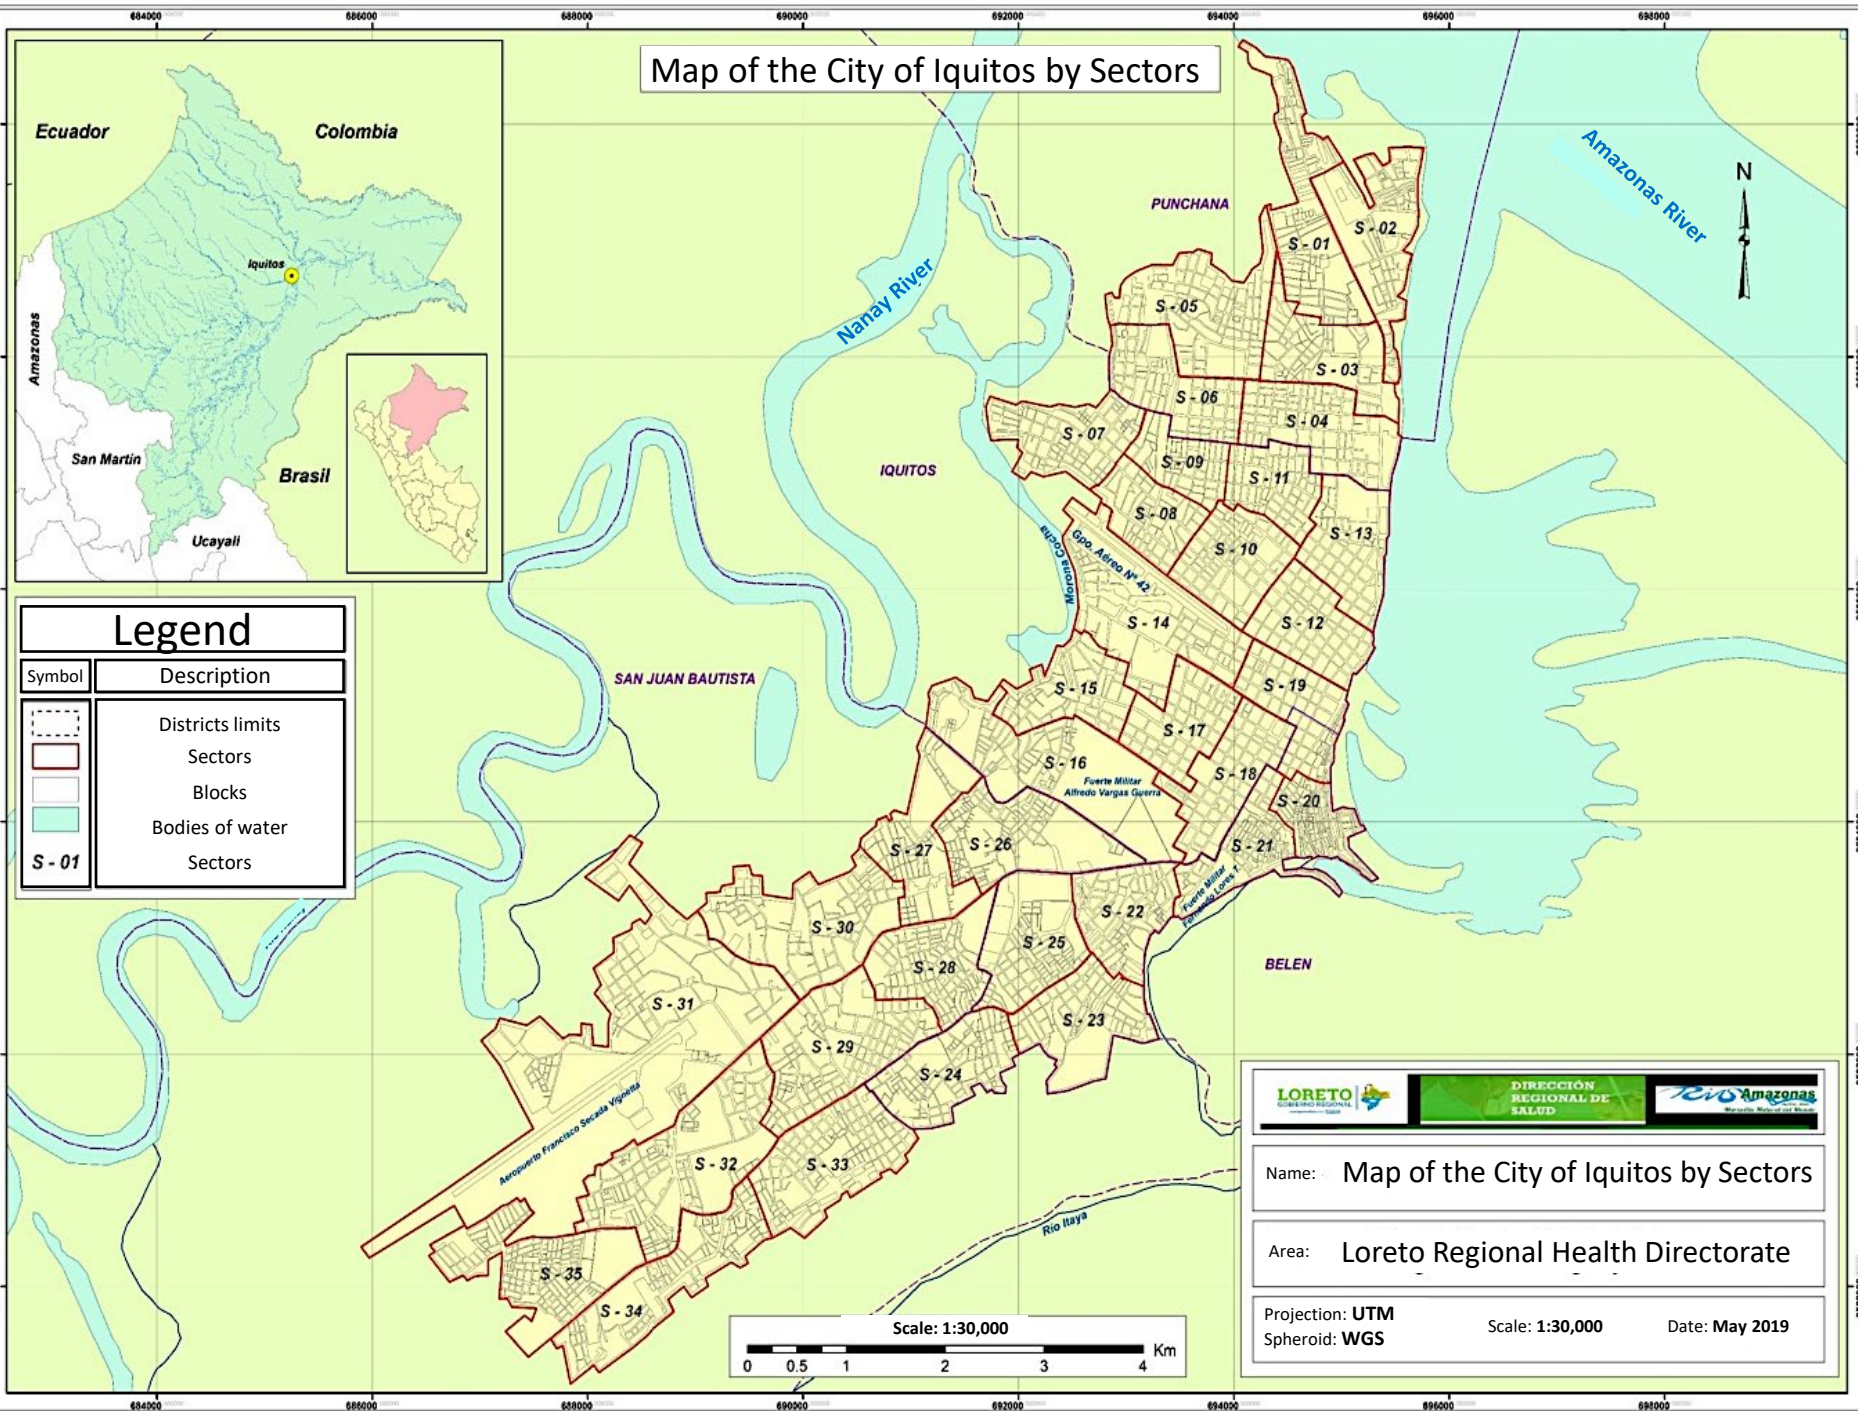

| Legend |                  |
|--------|------------------|
| Symbol | Description      |
|        | Districts limits |
|        | Sectors          |
|        | Blocks           |
|        | Bodies of water  |
|        | Sectors          |





Name: **Map of the City of Iquitos by Sectors**

Area: **Loreto Regional Health Directorate**

Projection: **UTM**  
Spheroid: **WGS**

Scale: **1:30,000**      Date: **May 2019**

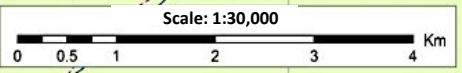

# Mapa de la ciudad de Iquitos por Sectores

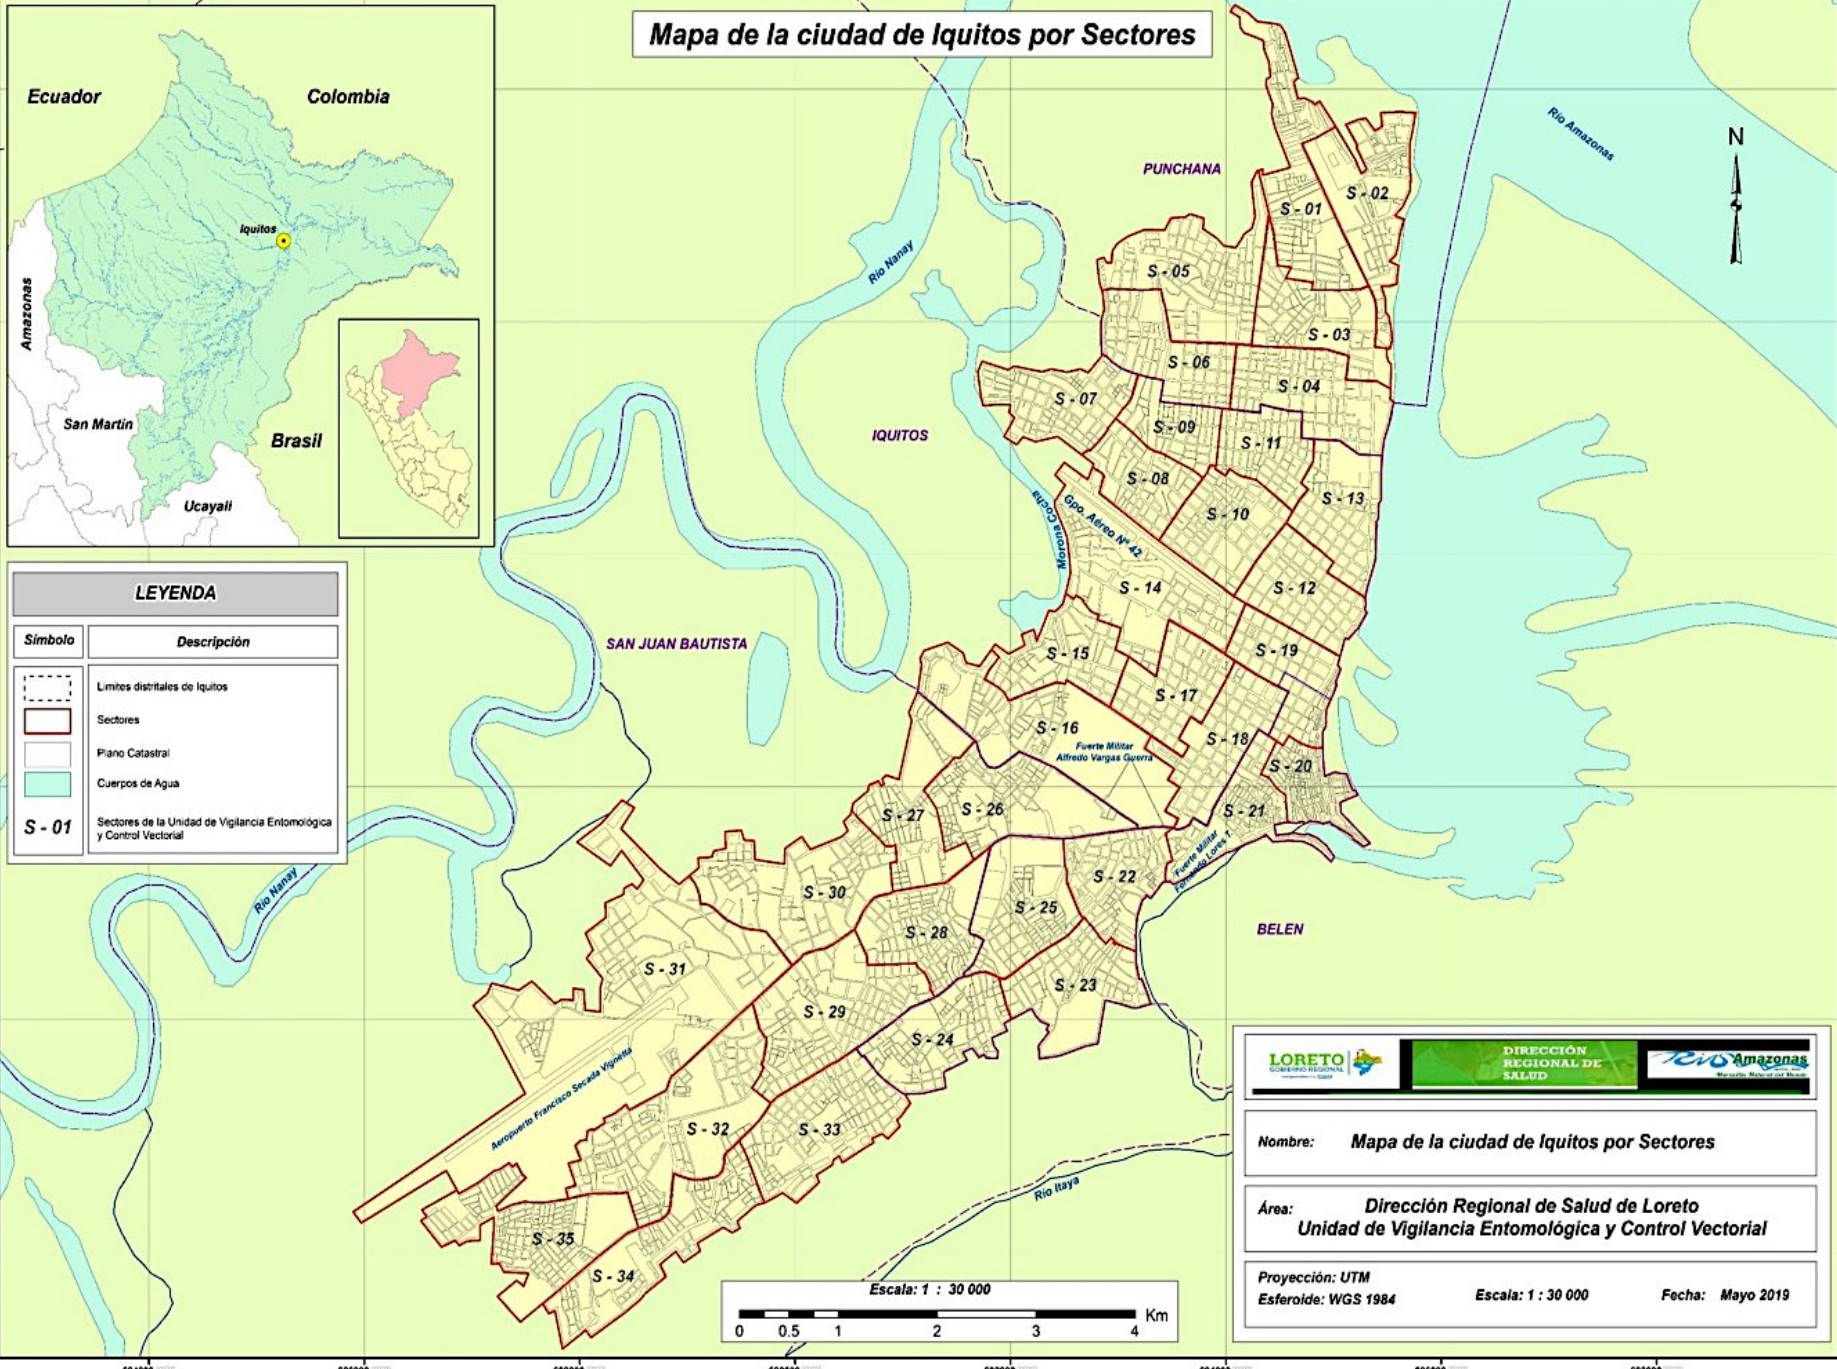

| LEYENDA       |                                                                      |
|---------------|----------------------------------------------------------------------|
| Símbolo       | Descripción                                                          |
|               | Límites distritales de Iquitos                                       |
|               | Sectores                                                             |
|               | Plano Catastral                                                      |
|               | Cuerpos de Agua                                                      |
| <b>S - 01</b> | Sectores de la Unidad de Vigilancia Entomológica y Control Vectorial |





**Nombre:** Mapa de la ciudad de Iquitos por Sectores

**Área:** Dirección Regional de Salud de Loreto  
Unidad de Vigilancia Entomológica y Control Vectorial

**Proyección:** UTM  
**Esferoide:** WGS 1984      **Escala:** 1 : 30 000      **Fecha:** Mayo 2019

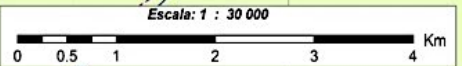

Supplement: mmc2.pdf [file mmc2.pdf]
