# Supplementary material
Source: PubMed Central journal article supplement (PMC8133769)
Supplement: mmc3.pdf [file mmc3.pdf]

# THE LANCET

## Global Health

### Supplementary appendix 3

This appendix formed part of the original submission and has been peer reviewed.  
We post it as supplied by the authors.

Supplement to: Álvarez-Antonio C, Meza-Sánchez G, Calampa C, et al. Seroprevalence of anti-SARS-CoV-2 antibodies in Iquitos, Peru in July and August, 2020: a population-based study. *Lancet Glob Health* 2021; published online May 19. [http://dx.doi.org/10.1016/S2214-109X\(21\)00173-X](http://dx.doi.org/10.1016/S2214-109X(21)00173-X).
